# Supplementary material for: Air pollutants and development of interstitial lung disease in patients with connective tissue disease: a population-based case–control study in Taiwan
Source: HighWire-hosted journal article supplement (doi:10.1136/bmjopen-2020-041405), 2020-12-01
Supplement: bmjopen-2020-041405supp002_data_supplement.pdf [file bmjopen-2020-041405supp002_data_supplement.pdf]

**Supplemental Table 1. Crude and adjusted odds ratios for the association between ILD and variables in patients with CTD**

|                                            | OR (95% CI)       | aOR (95% CI)       |
|--------------------------------------------|-------------------|--------------------|
| <b>Comorbidity</b>                         |                   |                    |
| CCI without pulmonary disease              | 2.16 (1.42–3.30)  | 1.64 (1.03–2.62)   |
| COPD                                       | 4.35 (2.92–6.48)  | 3.63 (2.38–5.54)   |
| <b>Urbanisation</b>                        |                   |                    |
| Level 1                                    | Reference         |                    |
| Level 2                                    | 0.89 (0.63–1.27)  |                    |
| Level 3                                    | 0.80 (0.51–1.25)  |                    |
| Level 4                                    | 0.88 (0.61–1.29)  |                    |
| <b>Payroll-related insured amount, NTD</b> |                   |                    |
| ≤15,840                                    | Reference         |                    |
| 15,841–20,100                              | 1.15 (0.76–1.72)  |                    |
| 20,100–27,600                              | 1.00 (0.69–1.46)  |                    |
| ≥27,600                                    | 0.94 (0.61–1.46)  |                    |
| <b>Medication</b>                          |                   |                    |
| Methotrexate                               | 1.66 (1.17–2.37)  | 1.31 (0.87–1.96)   |
| Sulphasalazine                             | 1.31 (0.90–1.93)  | 0.86 (0.56–1.32)   |
| Leflunomide                                | 1.57 (0.91–2.71)  | 1.07 (0.57–1.99)   |
| Hydroxychloroquine                         | 1.59 (1.18–2.14)  | 1.31 (0.95–1.82)   |
| Immunosuppressants                         | 2.21 (1.50–3.27)  | 1.29 (0.83–2.01)   |
| Steroid*, mg/day                           | 1.13 (1.09–1.17)  | 1.11 (1.06–1.15)   |
| Anti-TNF                                   | 2.10 (1.21–3.64)  | 1.25 (0.79–1.97)   |
| Tocilizumab                                | 8.00 (0.73–88.23) | 1.46 (0.78–2.71)   |
| Rituximab                                  | 2.55 (0.99–6.57)  | 8.11 (0.55–120.18) |
| <b>Air pollutants</b>                      |                   |                    |
| PM2.5 (per 10 µg/m <sup>3</sup> )          | 0.71 (0.57–0.89)  | 0.71 (0.37–1.37)   |
| PM10 (per 10 µg/m <sup>3</sup> )           | 0.82 (0.73–0.93)  | 1.10 (0.75–1.63)   |
| SO <sub>2</sub> (per 10 ppb)               | 0.27 (0.08–0.94)  | 0.52 (0.10–2.68)   |
| NO <sub>2</sub> (per 10 ppb)               | 1.04 (0.81–1.32)  |                    |
| CO (per 1 ppm)                             | 1.25 (0.69–2.26)  |                    |
| O <sub>3</sub> (per 10 ppb)                | 0.54 (0.32–0.91)  | 0.47 (0.25–0.89)   |

\*Prednisolone equivalent. Abbreviations: ILD, interstitial lung disease; CCI, Charlson comorbidity index; COPD, chronic obstructive pulmonary disease; TNF, tumour necrosis factor; NA, not available; PM2.5, particulate matter <2.5 µm; PM10, particulate matter <10 µm; SO<sub>2</sub>, sulphur dioxide; NO<sub>2</sub>, nitrogen dioxide; CO, carbon monoxide; O<sub>3</sub>, ozone.
